# Supplementary material for: Heat-light soaking treatments for high-performance CIGS solar cells on flexible substrates
Source: Research Square preprint supplement (doi:10.21203/rs.3.rs-2116168/v1), 2022-10-19
Supplement: Supplementary file 1 [file Table_TRPL.xlsx]

## Sheet: Sheet2
	Laser fluence	A1	τ1	A2	τ2	A1+A2 = ΣA	τeff	ΣA * τeff	Integration
	photon cm-2 pulse-1	a.u.	ns	a.u.	ns	a.u.	ns	a.u.	a.u.
Before HLS	170970793006	69566.8	232.391	40168.8	579.064	109736	359.291	3.9427e+07	3.96153e+07
Before HLS	370436718180	174816	175.951	150109	450.463	324925	302.77	9.83777e+07	9.97011e+07
Before HLS	809261753563	871001	156.473	560822	385.972	1.43182e+06	246.364	3.5275e+08	3.58951e+08
Before HLS	1396261476220	2.34997e+06	143.373	1.2834e+06	345.108	3.63337e+06	214.631	7.79832e+08	7.93787e+08
Before HLS	2251115441250	5.59878e+06	130.616	2.87281e+06	305.289	8.47159e+06	189.85	1.60833e+09	1.63969e+09
After HLS	170970793006	314230	110.569	111561	365.389	425791	177.334	7.55072e+07	7.87682e+07
After HLS	370436718180	1.17434e+06	101.869	311221	290.248	1.48556e+06	141.334	2.0996e+08	2.18672e+08
After HLS	809261753563	4.34993e+06	86.2418	1.6967e+06	195.669	6.04662e+06	116.947	7.07136e+08	7.33198e+08
After HLS	1396261476220	1.04587e+07	90.035	3.1925e+06	181.756	1.36512e+07	111.485	1.52191e+09	1.57186e+09
After HLS	2251115441250	2.17241e+07	94.9604	4.90237e+06	175.105	2.66265e+07	109.716	2.92136e+09	3.01374e+09
