# Supplementary figures and images for: Heat-light soaking treatments for high-performance CIGS solar cells on flexible substrates
Source: Research Square preprint supplement (doi:10.21203/rs.3.rs-2116168/v1), 2022-10-19

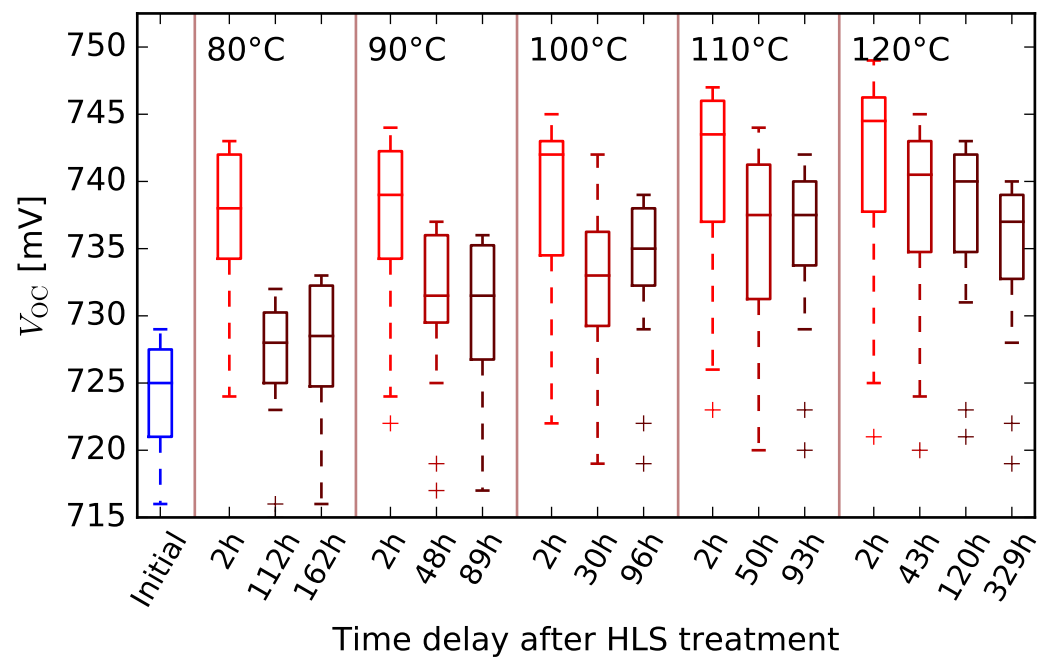

Supplement: Supplementary file 1 [file fig1.pdf › compilation_Figures_Si_data/figures/fig1.pdf]

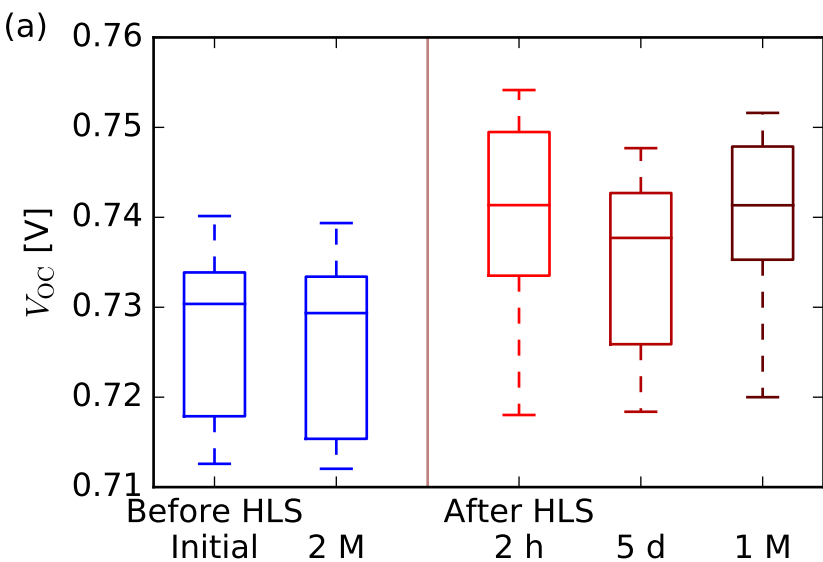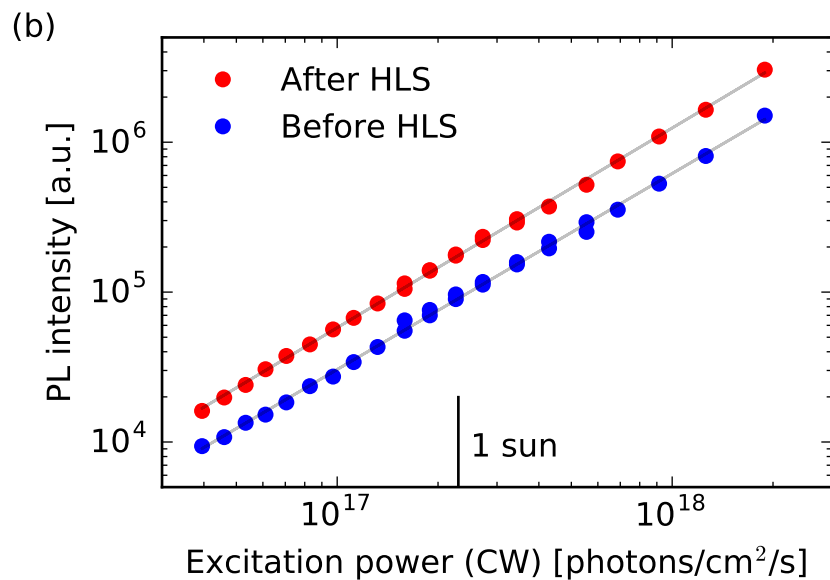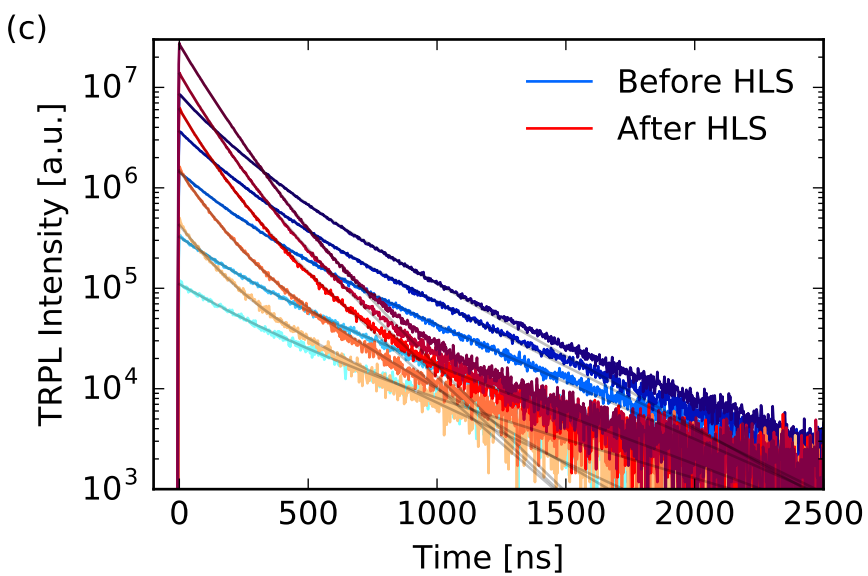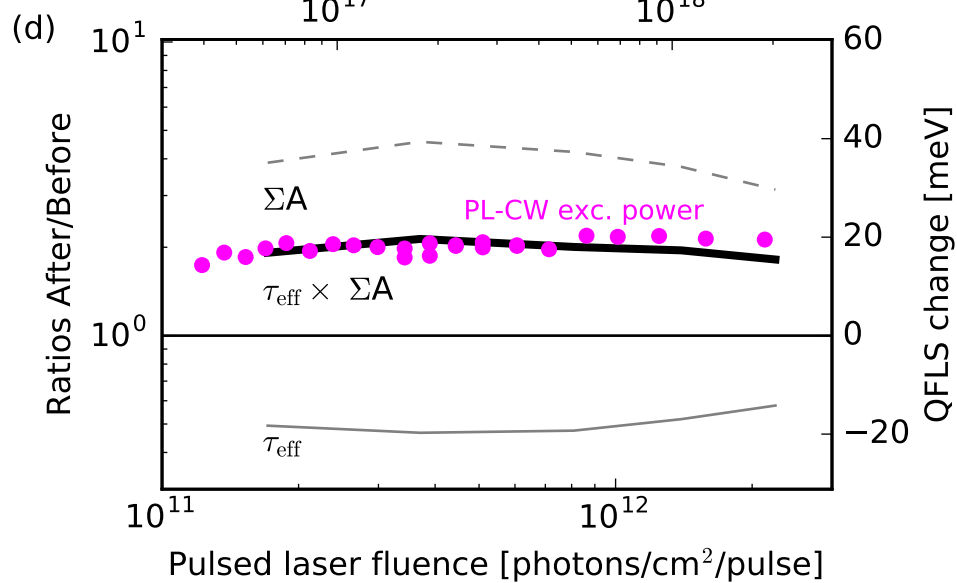

Supplement: Supplementary file 2 [file fig2.pdf › compilation_Figures_Si_data/figures/fig2.pdf]

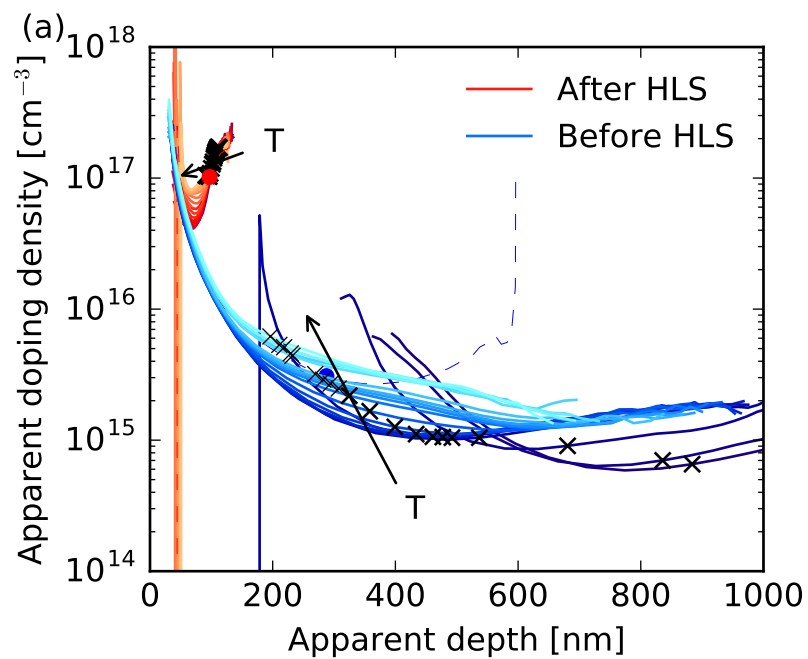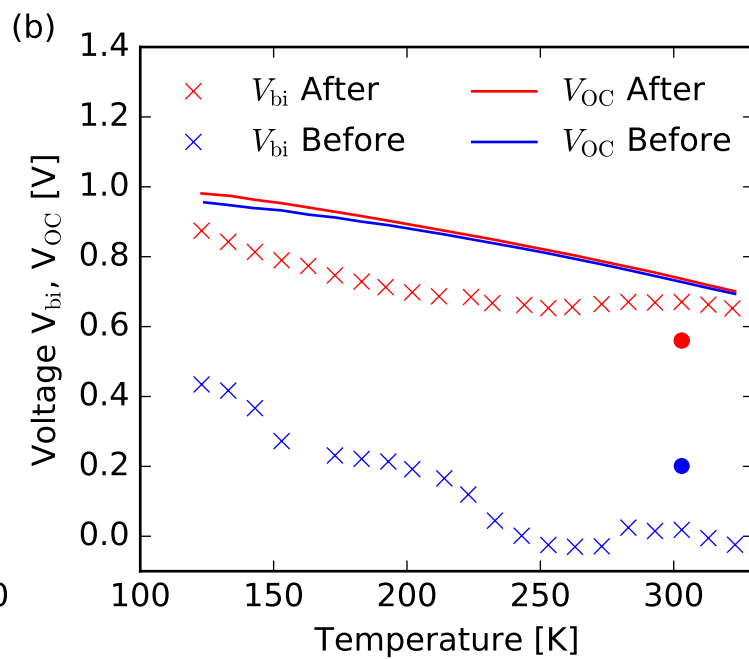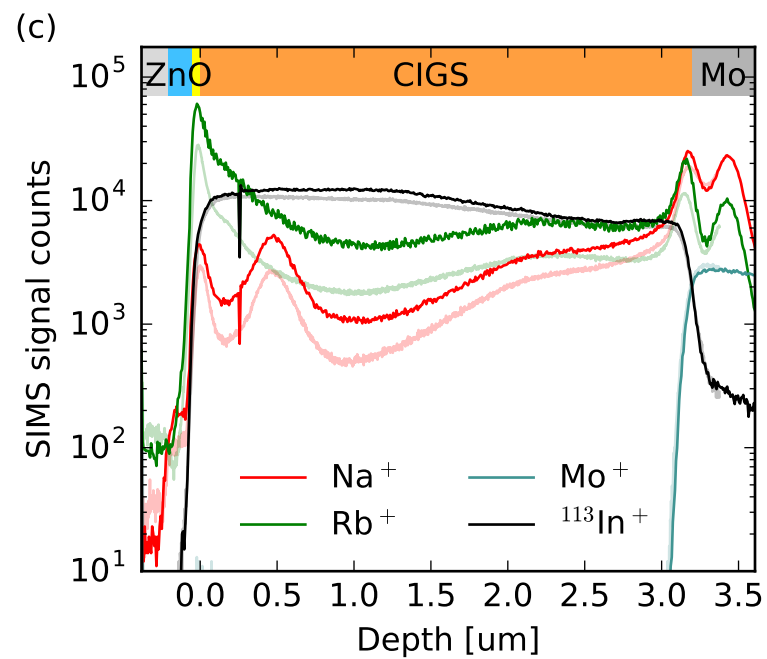

Supplement: Supplementary file 3 [file fig3.pdf › compilation_Figures_Si_data/figures/fig3.pdf]

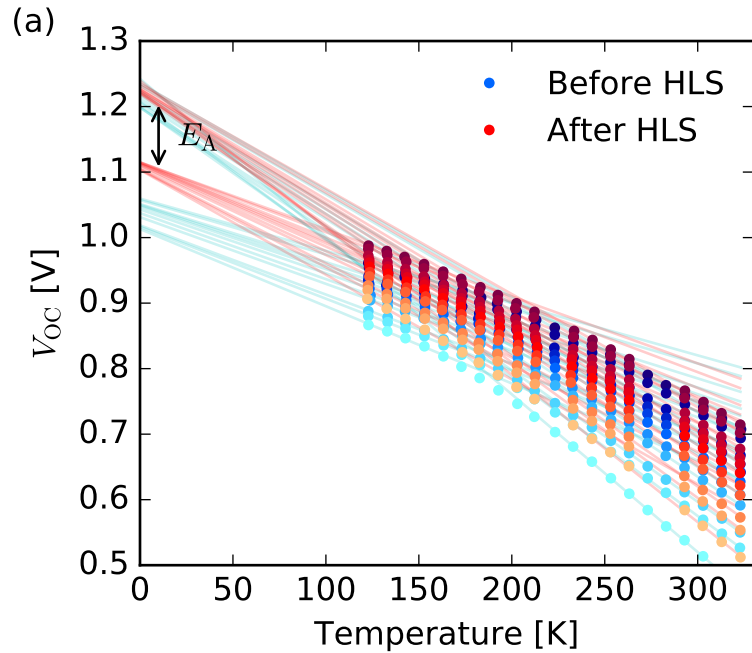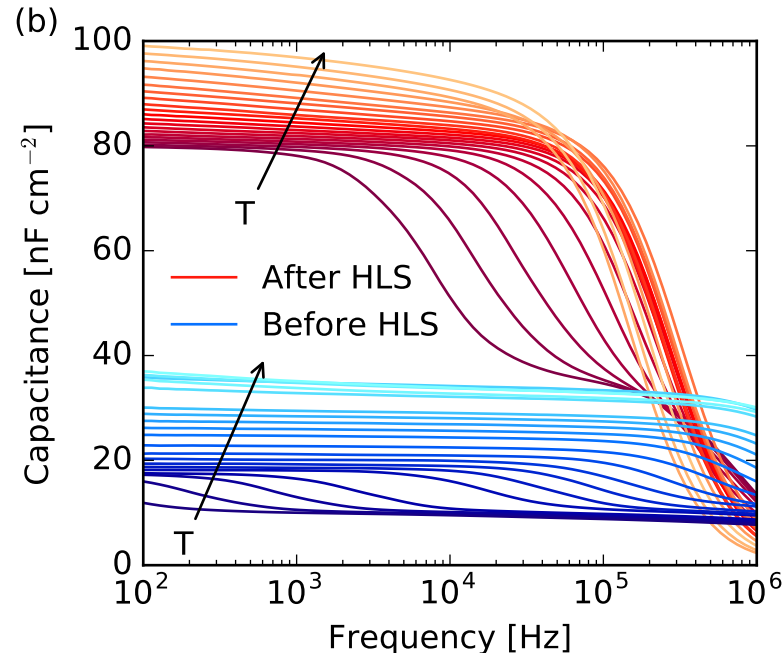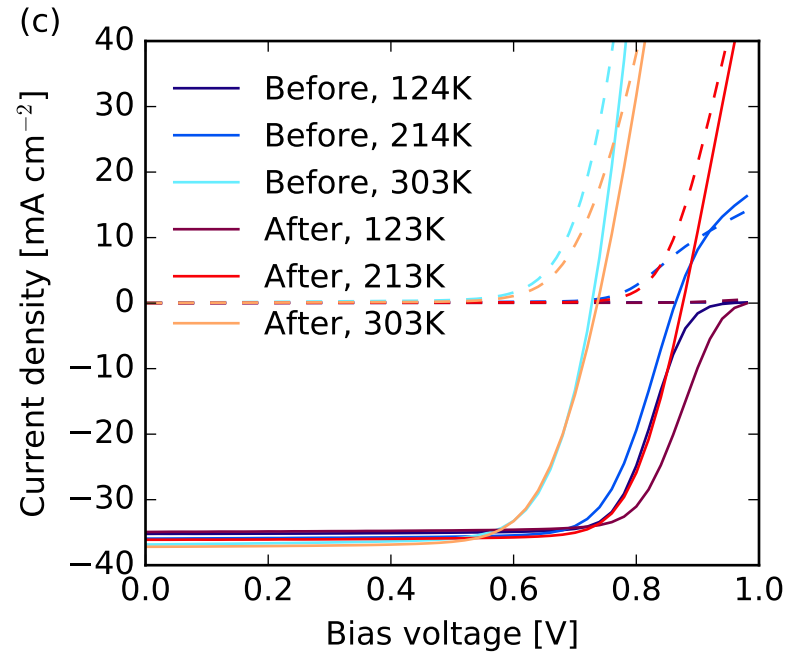

Supplement: Supplementary file 4 [file fig4.pdf › compilation_Figures_Si_data/figures/fig4.pdf]

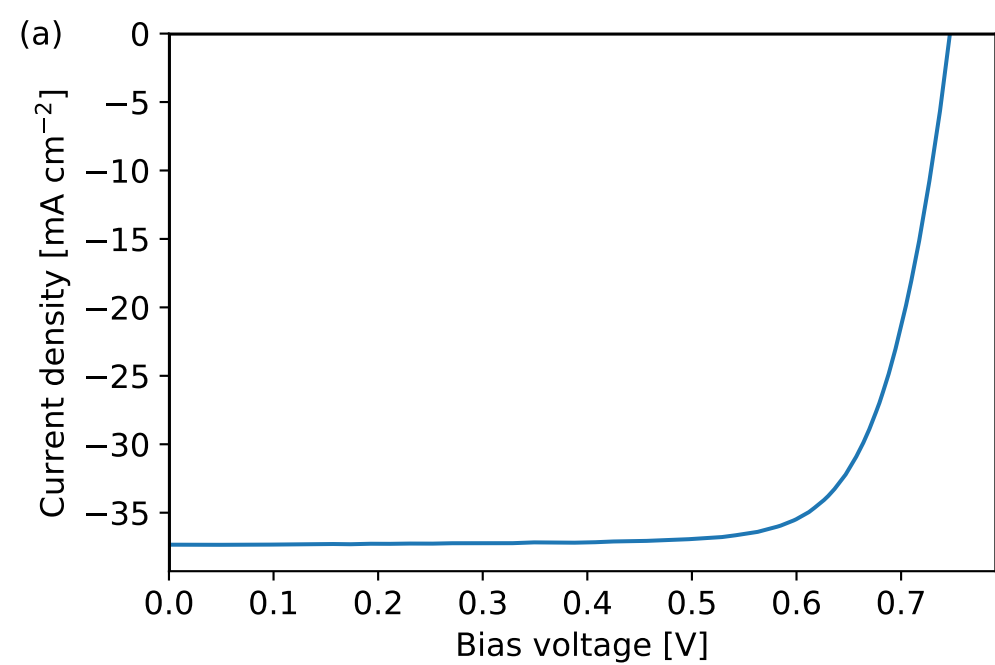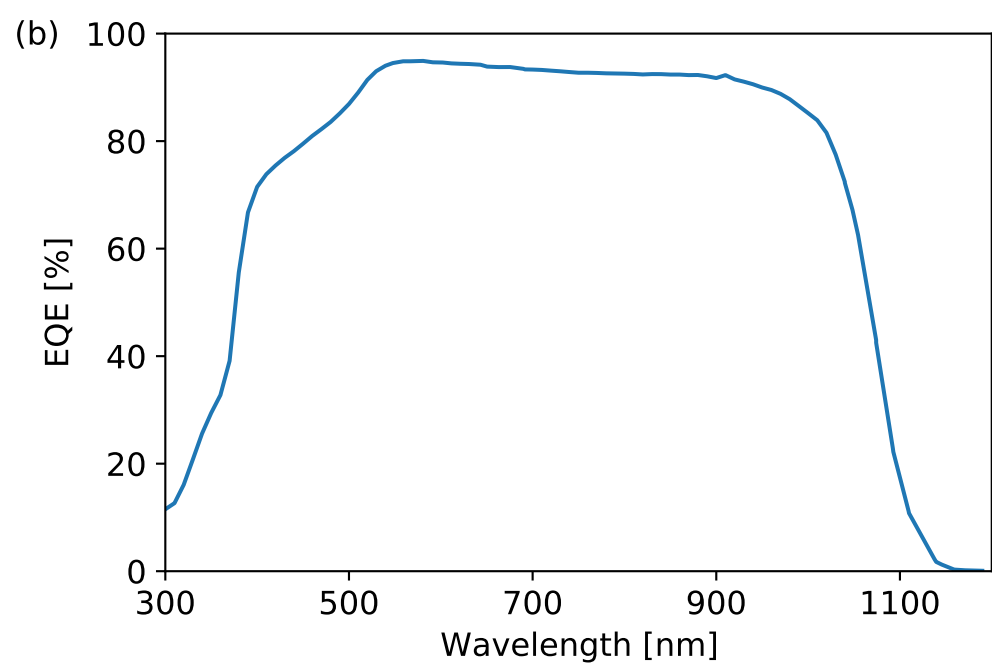

Supplement: Supplementary file 5 [file fig5.pdf › compilation_Figures_Si_data/figures/fig5.pdf]
